# Supplementary material
Source: PubMed Central journal article supplement (PMC7686076)
Supplement: NIHMS1618929-supplement-1.pdf [file NIHMS1618929-supplement-1.pdf]

**Figure S1. Association of BMI with cause-specific mortality (sub-distribution hazard ratios and 95 % confidence intervals), modelled using restricted cubic splines with 4 knots in a competing risks regression model, adjusted for age, sex, HIV status and socioeconomic status. A BMI of 22 was used as the reference to display the hazard ratios.**

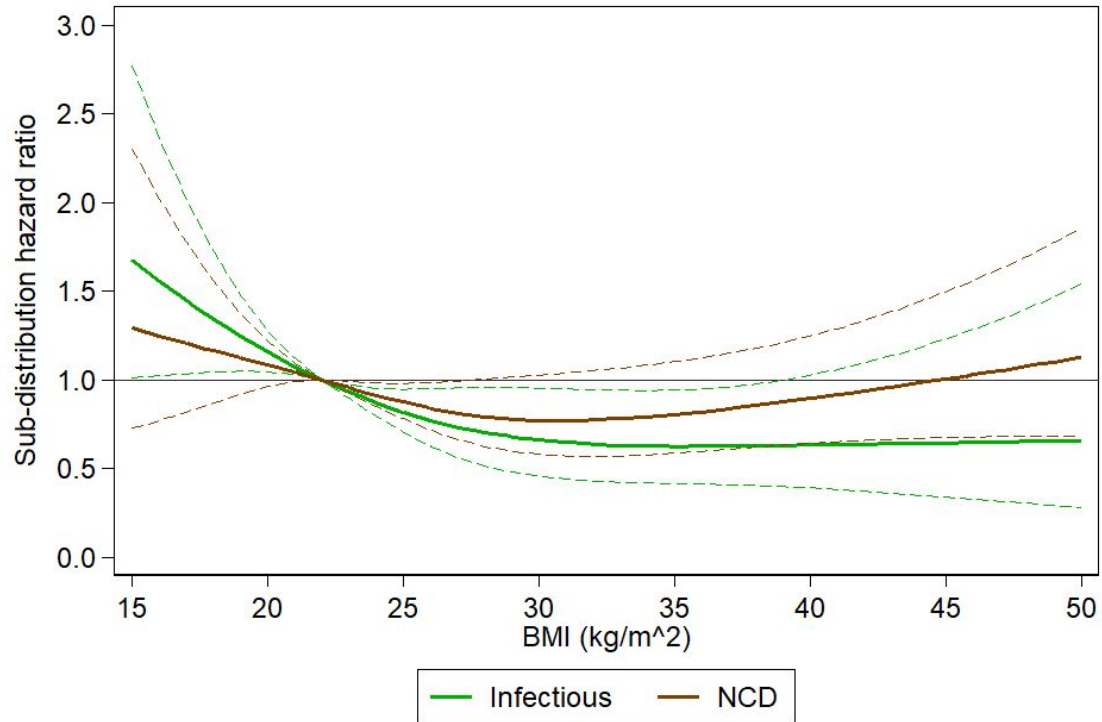

**Table S1. Baseline characteristics of those who had BMI measured in the 2010 survey, and those who were eligible for survey but did not have BMI measured**

|                                 | Eligible for survey <sup>1</sup> | BMI measured | BMI not measured <sup>2</sup> |
|---------------------------------|----------------------------------|--------------|-------------------------------|
|                                 | N=26,194                         | N=9,728      | N=16,466                      |
| <b>Median (IQR) age (years)</b> | 32 (20–50)                       | 31 (20–51)   | 32 (21–49)                    |
| <b>Age group</b>                |                                  |              | <b>P&lt;0.001<sup>3</sup></b> |
| <30                             | 12175 (46.5%)                    | 4656 (47.9%) | 7519 (45.7%)                  |
| 35-44                           | 5516 (21.1%)                     | 1817 (18.7%) | 3699 (22.5%)                  |
| 45-59                           | 4602 (17.6%)                     | 1771 (18.2%) | 2831 (17.2%)                  |
| 60+                             | 3901 (14.9%)                     | 1484 (15.3%) | 2417 (14.7%)                  |
| <b>Sex</b>                      |                                  |              | <b>P&lt;0.001</b>             |
| Male                            | 9966 (38.0%)                     | 2969 (30.5%) | 6997 (42.5%)                  |
| Female                          | 16228 (62.0%)                    | 6759 (69.5%) | 9469 (57.5%)                  |
| <b>Marital status</b>           |                                  |              | <b>P&lt;0.001</b>             |
| Single (never married)          | 8114 (31.2%)                     | 3044 (31.5%) | 5070 (31.1%)                  |
| Married/informal union          | 14958 (57.6%)                    | 5436 (56.2%) | 9522 (58.4%)                  |
| Widow/sep/divorced              | 2910 (11.2%)                     | 1185 (12.3%) | 1725 (10.6%)                  |
| Missing                         | 212                              | 63           | 149                           |
| <b>Education</b>                |                                  |              | <b>P&lt;0.001</b>             |
| None                            | 4558 (17.5%)                     | 1824 (18.8%) | 2734 (16.7%)                  |
| Less than complete secondary    | 13466 (51.6%)                    | 5287 (54.5%) | 8179 (49.9%)                  |
| Complete secondary/above        | 8051 (30.9%)                     | 2589 (26.7%) | 5462 (33.4%)                  |
| Missing                         | 119                              | 28           | 91                            |
| <b>Employed</b>                 |                                  |              | <b>P&lt;0.001</b>             |
| No                              | 19998 (77.3%)                    | 8164 (84.7%) | 11834 (73.0%)                 |
| Yes                             | 5859 (22.7%)                     | 1476 (15.3%) | 4383 (27.0%)                  |
| Missing                         | 337                              | 88           | 249                           |
| <b>Residence</b>                |                                  |              | <b>P&lt;0.001</b>             |
| Urban                           | 1953 (7.5 %)                     | 537 (5.5 %)  | 1416 (8.6 %)                  |
| Peri-urban                      | 8084 (30.9%)                     | 2980 (30.7%) | 5104 (31.1%)                  |
| Rural                           | 16092 (61.6%)                    | 6195 (63.8%) | 9897 (60.3%)                  |
| Missing                         | 65                               | 16           | 49                            |
| <b>SES tertile<sup>4</sup></b>  |                                  |              | <b>P&lt;0.001</b>             |
| Low                             | 8566 (33.6%)                     | 3451 (36.0%) | 5115 (32.2%)                  |
| Middle                          | 8330 (32.7%)                     | 3199 (33.4%) | 5131 (32.3%)                  |
| High                            | 8569 (33.7%)                     | 2934 (30.6%) | 5635 (35.5%)                  |
| Missing                         | 729                              | 144          | 585                           |

<sup>1</sup>Individuals who were on the eligibility list for the 2010 survey (aged ≥15 years as of Dec 2009 and resident in the DSS), were successfully contacted (92% of all on the list) and still eligible at the time of contact (75% of those contacted). <sup>2</sup>Includes 16,431 individuals who refused consent, and 35 individuals who consented but for whom BMI measurements were not available. <sup>3</sup>P-value from Chi-squared test comparing those with BMI measurements and those without (excludes missing values). <sup>4</sup>Calculated from an asset index derived using principal component analysis, based on ownership of household items as measured in the annual household survey.

**Table S2. Association of BMI and other covariates with all-cause mortality**

|                                           | <b>Crude HR<sup>1</sup></b><br><b>(95% CI)</b> | <b>Adjusted HR<sup>1</sup></b><br><b>(95% CI)</b> |
|-------------------------------------------|------------------------------------------------|---------------------------------------------------|
| <b>BMI (kg/m<sup>2</sup>)<sup>2</sup></b> | P<0.001                                        | P<0.001                                           |
| <18.5                                     | 1.54 (1.28 -1.86 )                             | 1.37 (1.12 -1.69 )                                |
| 18.5-24.9                                 | 1                                              | 1                                                 |
| 25.0-29.9                                 | 0.64 (0.56 -0.73 )                             | 0.80 (0.69 -0.92 )                                |
| 30.0-34.9                                 | 0.53 (0.43 -0.65 )                             | 0.75 (0.60 -0.93 )                                |
| ≥35                                       | 0.54 (0.44 -0.67 )                             | 0.80 (0.64 -1.02 )                                |
| <b>Sex</b>                                | P<0.001                                        | P<0.001                                           |
| Male                                      | 1                                              | 1                                                 |
| Female                                    | 0.43 (0.37 -0.50 )                             | 0.52 (0.44 -0.62 )                                |
| <b>HIV status<sup>3</sup></b>             | P<0.001                                        | P<0.001                                           |
| Negative                                  | 1                                              | 1                                                 |
| Positive not on ART                       | 3.68 (2.91 -4.67 )                             | 3.73 (2.93 -4.75 )                                |
| Positive on ART                           | 3.27 (2.59 -4.12 )                             | 3.11 (2.44 -3.95 )                                |
| Unknown <sup>4</sup>                      | 3.44 (2.83 -4.19 )                             | 3.11 (2.54 -3.81 )                                |
| <b>SES tertile<sup>5</sup></b>            | P=0.49                                         | P=0.68                                            |
| Low                                       | 1                                              | 1                                                 |
| Middle                                    | 0.96 (0.81 -1.14 )                             | 0.96 (0.81 -1.15 )                                |
| High                                      | 0.90 (0.76 -1.07 )                             | 0.93 (0.78 -1.10 )                                |

<sup>1</sup>HRs estimated from Cox regression; adjusted for current age (as timescale). Models were weighted to account for non-response in the 2010 survey. <sup>2</sup>BMI modelled as a continuous covariate by restricted cubic splines with 4 knots; deaths / person-years in each group shown for information only. HRs are presented at selected values of BMI, comparing the median value in each BMI group to BMI 22 as the reference. <sup>3</sup>Imputed HIV status in 2010, based on complete history of testing in the DSS, including subsequent years. <sup>4</sup>Includes 402 individuals who never tested, 138 whose last test was negative but >2 years before the survey, and individuals whose first test was after 2010, and was positive. <sup>5</sup>Calculated from an asset index derived using principal component analysis, based on ownership of household items as measured in the annual household survey.

**Table S3. Causes of death, by BMI category**

|                             | <b>All deaths</b> | <b>BMI (kg/m<sup>2</sup>)<sup>1</sup></b> |                   |                  |                  |              |
|-----------------------------|-------------------|-------------------------------------------|-------------------|------------------|------------------|--------------|
|                             |                   | <b>&lt;18.5</b>                           | <b>18.5– 24.9</b> | <b>25.0–29.9</b> | <b>30.0–34.9</b> | <b>≥35.0</b> |
| Infectious/parasitic        | 261 (33.5%)       | 31 (36.9%)                                | 131 (39.1%)       | 52 (28.3%)       | 29 (31.2%)       | 18 (21.7%)   |
| Neoplasms                   | 97 (12.5%)        | 18 (21.4%)                                | 39 (11.6%)        | 15 (8.2 %)       | 9 (9.7 %)        | 16 (19.3%)   |
| Endocrine/metabolic         | 26 (3.3 %)        | 0 (0.0 %)                                 | 10 (3.0 %)        | 9 (4.9 %)        | 4 (4.3 %)        | 3 (3.6 %)    |
| Cardiovascular              | 169 (21.7%)       | 14 (16.7%)                                | 55 (16.4%)        | 49 (26.6%)       | 25 (26.9%)       | 26 (31.3%)   |
| COPD/asthma                 | 8 (1.0 %)         | 1 (1.2 %)                                 | 3 (0.9 %)         | 1 (0.5 %)        | 0 (0.0 %)        | 3 (3.6 %)    |
| Acute abdomen/liver failure | 27 (3.5 %)        | 3 (3.6 %)                                 | 7 (2.1 %)         | 10 (5.4 %)       | 2 (2.2 %)        | 5 (6.0 %)    |
| Renal failure               | 32 (4.1 %)        | 1 (1.2 %)                                 | 7 (2.1 %)         | 17 (9.2 %)       | 5 (5.4 %)        | 2 (2.4 %)    |
| Epilepsy                    | 3 (0.4 %)         | 1 (1.2 %)                                 | 0 (0.0 %)         | 2 (1.1 %)        | 0 (0.0 %)        | 0 (0.0 %)    |
| Pregnancy/childbirth        | 5 (0.6 %)         | 0 (0.0 %)                                 | 1 (0.3 %)         | 1 (0.5 %)        | 1 (1.1 %)        | 2 (2.4 %)    |
| Injury/accident/poisoning   | 83 (10.7%)        | 8 (9.5 %)                                 | 52 (15.5%)        | 18 (9.8 %)       | 3 (3.2 %)        | 2 (2.4 %)    |
| Unknown                     | 68 (8.7 %)        | 7 (8.3 %)                                 | 30 (9.0 %)        | 10 (5.4 %)       | 15 (16.1%)       | 6 (7.2 %)    |
| <b>Total</b>                | <b>779</b>        | <b>84</b>                                 | <b>335</b>        | <b>184</b>       | <b>93</b>        | <b>83</b>    |
